# Supplementary material
Source: HighWire-hosted journal article supplement (https://bmjopen.bmj.com/content/8/4/e018854)
Supplement: inline-supplementary-material-1 [file inline-supplementary-material-1.pdf]

Supplement Table 1 pairwise correlations

|                            | <b>GP visits</b> | <b>gender</b> | <b>age</b> | <b>education</b> | <b>make ends meet</b> | <b>employment status</b> | <b>health</b> | <b>social integration</b> | <b>contact frequency</b> |
|----------------------------|------------------|---------------|------------|------------------|-----------------------|--------------------------|---------------|---------------------------|--------------------------|
| <b>gender</b>              | 0.0200           |               |            |                  |                       |                          |               |                           |                          |
| <b>age</b>                 | 0.1192           | 0.0089        |            |                  |                       |                          |               |                           |                          |
| <b>education</b>           | -0.1297          | -0.0809       | -0.2345    |                  |                       |                          |               |                           |                          |
| <b>make ends meet</b>      | -0.1231          | -0.0414       | 0.0339     | 0.2156           |                       |                          |               |                           |                          |
| <b>employment status</b>   | 0.1044           | 0.1287        | 0.0709     | -0.1895          | -0.1304               |                          |               |                           |                          |
| <b>health</b>              | -0.2585          | -0.0460       | -0.2478    | 0.2496           | 0.2650                | -0.1756                  |               |                           |                          |
| <b>social integration</b>  | -0.0984          | -0.0917       | -0.2636    | 0.2637           | 0.2119                | -0.0692                  | 0.2574        |                           |                          |
| <b>contact frequency</b>   | 0.0446           | -0.0650       | -0.0522    | -0.1362          | -0.1141               | 0.0216                   | -0.0594       | -0.0631                   |                          |
| <b>emotional closeness</b> | -0.0098          | 0.1232        | -0.0793    | 0.0962           | 0.0755                | 0.0008                   | 0.1032        | 0.3924                    | -0.1698                  |
