# Supplementary material
Source: HighWire-hosted journal article supplement (https://bmjopen.bmj.com/content/8/4/e018854)
Supplement: inline-supplementary-material-2 [file inline-supplementary-material-2.pdf]

SUPPLEMENT Table 2

Model 1 - Negative binomial regression models based on full sample (social integration index)

| <i>Variable</i>                                                                           | <i>irr</i> | <i>std.error</i> | <i>conf.low</i> | <i>conf.high</i> | <i>p.value</i> |
|-------------------------------------------------------------------------------------------|------------|------------------|-----------------|------------------|----------------|
| <b>Gender: female (male = Ref.)</b>                                                       | 1.0362     | 0.0298           | 0.9773          | 1.0986           | 0.2338         |
| <b>Age</b>                                                                                | 1.0064     | 0.0028           | 1.001           | 1.0119           | 0.0205         |
| <b>Education (ISCED-1997 Coding: 0=low – 6=high)</b>                                      | 0.9439     | 0.0132           | 0.9197          | 0.9687           | 0.000          |
| <b>Income: make ends meet: fairly easy or easy (with great or some difficulty = Ref.)</b> | 0.8499     | 0.0305           | 0.8006          | 0.9024           | 0.000          |
| <b>Employment status (employed = Ref.)</b>                                                |            |                  |                 |                  |                |
| <i>retired</i>                                                                            | 1.2417     | 0.0567           | 1.111           | 1.3877           | 1e-04          |
| <i>unemployed</i>                                                                         | 1.054      | 0.0622           | 0.933           | 1.1907           | 0.3982         |
| <i>permanently sick or disabled</i>                                                       | 1.4841     | 0.0938           | 1.2349          | 1.7836           | 0.000          |
| <i>homemaker</i>                                                                          | 1.291      | 0.0623           | 1.1427          | 1.4586           | 0.000          |
| <b>Self-perceived health (0=poor – 4=excellent)</b>                                       | 0.7405     | 0.0272           | 0.7021          | 0.781            | 0.000          |
| <b>Social integration index (0=low – 6=high)</b>                                          | 0.9876     | 0.0118           | 0.965           | 1.0106           | 0.288          |
| Intercept                                                                                 | 8.9883     | 0.0626           | 7.9503          | 10.1618          | 0.000          |
| Alpha                                                                                     | 0.6091     | 0.0251           | 0.5618          | 0.6604           |                |
| n – unweighted                                                                            |            |                  | 47,066          |                  |                |
| N – weighted                                                                              |            |                  | 119,390,189     |                  |                |
| Number of strata (countries)                                                              |            |                  | 16              |                  |                |
| Number of primary sampling units (households)                                             |            |                  | 34,623          |                  |                |

IRR = incidence rate ratio

95%-confidence interval

alpha = estimate of dispersion parameters

Age, social integration, contact frequency and closeness are centered at the mean

n = number of observations; N = population size based on survey design

Observations with missing values were dropped (listwise deletion).

Model 2 - Negative binomial regression models based on full sample (contact frequency)

| <i>variable</i>                                                                                       | <i>irr</i> | <i>std.error</i> | <i>conf.low</i> | <i>conf.high</i> | <i>p.value</i> |
|-------------------------------------------------------------------------------------------------------|------------|------------------|-----------------|------------------|----------------|
| <b>Gender: female (male = Ref.)</b>                                                                   | 1.0548     | 0.0341           | 0.9867          | 1.1276           | 0.1174         |
| <b>Age</b>                                                                                            | 1.0059     | 0.0029           | 1.0002          | 1.0116           | 0.041          |
| <b>Education (ISCED-1997 Coding: 0=low – 6=high)</b>                                                  | 0.945      | 0.013            | 0.9212          | 0.9694           | 0.000          |
| <b>Income: make ends meet: fairly easy or easy (with great or some difficulty = Ref.)</b>             | 0.8487     | 0.0333           | 0.7951          | 0.9058           | 0.000          |
| <b>Employment status (employed = Ref.)</b>                                                            |            |                  |                 |                  |                |
| <i>retired</i>                                                                                        | 1.2792     | 0.0588           | 1.1401          | 1.4353           | 0.000          |
| <i>unemployed</i>                                                                                     | 1.0731     | 0.0656           | 0.9436          | 1.2204           | 0.2821         |
| <i>permanently sick or disabled</i>                                                                   | 1.5336     | 0.0984           | 1.2646          | 1.8599           | 0.000          |
| <i>homemaker</i>                                                                                      | 1.271      | 0.0657           | 1.1174          | 1.4457           | 3e-04          |
| <b>Self-perceived health (0=poor – 4=excellent)</b>                                                   | 0.7391     | 0.0286           | 0.6989          | 0.7817           | 0.000          |
| <b>Average of contact frequency in social network (0=less than once per month or never – 5=daily)</b> | 1.0351     | 0.0182           | 0.9988          | 1.0726           | 0.058          |
| Intercept                                                                                             | 8.7504     | 0.0655           | 7.696           | 9.9492           | 0.000          |
| alpha                                                                                                 | 0.6055     | 0.0266           | 0.5556          | 0.6600           |                |
| n – unweighted                                                                                        |            |                  | 43,962          |                  |                |
| N – weighted                                                                                          |            |                  | 110,219,002     |                  |                |
| Number of strata (countries)                                                                          |            |                  | 16              |                  |                |
| Number of primary sampling units (households)                                                         |            |                  | 32,616          |                  |                |

IRR = incidence rate ratio

95%-confidence interval

alpha = estimate of dispersion parameters

Age, social integration, contact frequency and closeness are centered at the mean

n = number of observations; N = population size based on survey design

Observations with missing values were dropped (listwise deletion).

Model 3 - Negative binomial regression models based on full sample (emotional closeness)

| <i>variable</i>                                                                           | <i>irr</i> | <i>std.error</i> | <i>conf.low</i> | <i>conf.high</i> | <i>p.value</i> |
|-------------------------------------------------------------------------------------------|------------|------------------|-----------------|------------------|----------------|
| <b>Gender: female (male = Ref.)</b>                                                       | 1.0432     | 0.0344           | 0.9752          | 1.1158           | 0.219          |
| <b>Age</b>                                                                                | 1.0064     | 0.0028           | 1.0009          | 1.012            | 0.0228         |
| <b>Education (ISCED-1997 Coding: 0=low – 6=high)</b>                                      | 0.9434     | 0.0136           | 0.9187          | 0.9689           | 0.000          |
| <b>Income: make ends meet: fairly easy or easy (with great or some difficulty = Ref.)</b> | 0.8354     | 0.0335           | 0.7823          | 0.8921           | 0.000          |
| <b>Employment status (employed = Ref.)</b>                                                |            |                  |                 |                  |                |
| <i>retired</i>                                                                            | 1.2502     | 0.0587           | 1.1143          | 1.4028           | 1e-04          |
| <i>unemployed</i>                                                                         | 1.0476     | 0.0648           | 0.9226          | 1.1896           | 0.4729         |
| <i>permanently sick or disabled</i>                                                       | 1.5124     | 0.0962           | 1.2524          | 1.8262           | 0.000          |
| <i>homemaker</i>                                                                          | 1.2873     | 0.0649           | 1.1334          | 1.462            | 1e-04          |
| <b>Self-perceived health (0=poor – 4=excellent)</b>                                       | 0.7381     | 0.0292           | 0.697           | 0.7817           | 0.000          |
| <b>Number of very to extremely close people in social network (0-7)</b>                   | 1.0151     | 0.0115           | 0.9925          | 1.0381           | 0.193          |
| Intercept                                                                                 | 9.0879     | 0.0635           | 8.0245          | 10.2921          | 0.000          |
| alpha                                                                                     | 0.6112     | 0.0270           | 0.5605          | 0.6666           |                |
| n – unweighted                                                                            |            |                  | 44,840          |                  |                |
| N – weighted                                                                              |            |                  | 112,626,161     |                  |                |
| Number of strata (countries)                                                              |            |                  | 16              |                  |                |
| Number of primary sampling units (households)                                             |            |                  | 33,160          |                  |                |

IRR = incidence rate ratio

95%-confidence interval

alpha = estimate of dispersion parameters

Age, social integration, contact frequency and closeness are centered at the mean

n = number of observations; N = population size based on survey design

Observations with missing values were dropped (listwise deletion).
