# Supplementary material
Source: HighWire-hosted journal article supplement (https://bmjopen.bmj.com/content/8/4/e018854)
Supplement: inline-supplementary-material-3 [file inline-supplementary-material-3.pdf]

SUPPLEMENT Table 3

Model 4 - Negative binomial regression models based on full sample - 2-way interaction  
(social integration index)

| <i>Variable</i>                                                                           | <i>irr</i> | <i>std.error</i> | <i>conf.low</i> | <i>conf.high</i> | <i>p.value</i> |
|-------------------------------------------------------------------------------------------|------------|------------------|-----------------|------------------|----------------|
| <b>Gender: female (male = Ref.)</b>                                                       | 1.0378     | 0.0301           | 0.9784          | 1.1008           | 0.2175         |
| <b>Age</b>                                                                                | 1.0065     | 0.0028           | 1.001           | 1.0121           | 0.0208         |
| <b>Education (ISCED-1997 Coding: 0=low – 6=high)</b>                                      | 0.9441     | 0.0132           | 0.92            | 0.9688           | 0.000          |
| <b>Income: make ends meet: fairly easy or easy (with great or some difficulty = Ref.)</b> | 0.8492     | 0.0303           | 0.8002          | 0.9012           | 0.000          |
| <b>Employment status (employed = Ref.)</b>                                                |            |                  |                 |                  |                |
| <i>retired</i>                                                                            | 1.2398     | 0.0572           | 1.1082          | 1.3869           | 2e-04          |
| <i>unemployed</i>                                                                         | 1.0508     | 0.0616           | 0.9312          | 1.1856           | 0.4216         |
| <i>permanently sick or disabled</i>                                                       | 1.4829     | 0.094            | 1.2332          | 1.783            | 0.000          |
| <i>homemaker</i>                                                                          | 1.2876     | 0.0626           | 1.139           | 1.4556           | 1e-04          |
| <b>Self-perceived health (0=poor – 4=excellent)</b>                                       | 0.7391     | 0.0262           | 0.7022          | 0.778            | 0.000          |
| <b>Social integration index (0=low – 6=high)</b>                                          | 1.0032     | 0.0215           | 0.9617          | 1.0464           | 0.8831         |
| <b>Self-perceived health * Social integration index</b>                                   | 0.9902     | 0.0096           | 0.9716          | 1.0091           | 0.3059         |
| Intercept                                                                                 | 9.0466     | 0.0621           | 8.0092          | 10.2184          | 0.000          |
| Alpha                                                                                     | 0.6090     | 0.0250           | 0.5618          | 0.6601           |                |
| n – unweighted                                                                            |            |                  | 47,066          |                  |                |
| N – weighted                                                                              |            |                  | 119,390,189     |                  |                |
| Number of strata (countries)                                                              |            |                  | 16              |                  |                |
| Number of primary sampling units (households)                                             |            |                  | 34,623          |                  |                |

IRR = incidence rate ratio

95%-confidence interval

alpha = estimate of dispersion parameters

Age, social integration, contact frequency and closeness are centered at the mean

n = number of observations; N = population size based on survey design

Observations with missing values were dropped (listwise deletion).

Model 5 - Negative binomial regression models based on full sample - 2-way interaction  
(contact frequency)

| <i>variable</i>                                                                                       | <i>irr</i> | <i>std.error</i> | <i>conf.low</i> | <i>conf.high</i> | <i>p.value</i> |
|-------------------------------------------------------------------------------------------------------|------------|------------------|-----------------|------------------|----------------|
| <b>Gender: female (male = Ref.)</b>                                                                   | 1.0568     | 0.0336           | 0.9895          | 1.1287           | 0.0997         |
| <b>Age</b>                                                                                            | 1.0062     | 0.0028           | 1.0007          | 1.0117           | 0.0268         |
| <b>Education (ISCED-1997 Coding: 0=low – 6=high)</b>                                                  | 0.9458     | 0.0124           | 0.9231          | 0.969            | 0.000          |
| <b>Income: make ends meet: fairly easy or easy (with great or some difficulty = Ref.)</b>             | 0.8498     | 0.0331           | 0.7965          | 0.9068           | 0.000          |
| <b>Employment status (employed = Ref.)</b>                                                            |            |                  |                 |                  |                |
| <i>retired</i>                                                                                        | 1.2739     | 0.056            | 1.1416          | 1.4216           | 0.000          |
| <i>unemployed</i>                                                                                     | 1.068      | 0.0645           | 0.9411          | 1.2119           | 0.3082         |
| <i>permanently sick or disabled</i>                                                                   | 1.5354     | 0.0977           | 1.2678          | 1.8596           | 0.000          |
| <i>homemaker</i>                                                                                      | 1.2687     | 0.0657           | 1.1154          | 1.4431           | 3e-04          |
| <b>Self-perceived health (0=poor – 4=excellent)</b>                                                   | 0.738      | 0.027            | 0.6999          | 0.7781           | 0.000          |
| <b>Average of contact frequency in social network (0=less than once per month or never – 5=daily)</b> | 0.9941     | 0.0441           | 0.9118          | 1.0839           | 0.8938         |
| <b>Self-perceived health * contact frequency</b>                                                      | 1.026      | 0.0248           | 0.9773          | 1.0771           | 0.3007         |
| Intercept                                                                                             | 8.7676     | 0.0642           | 7.7315          | 9.9425           | 0.000          |
| alpha                                                                                                 | 0.6049     | 0.0259           | 0.5562          | 0.6579           |                |
| n – unweighted                                                                                        |            |                  | 43,962          |                  |                |
| N – weighted                                                                                          |            |                  | 110,219,002     |                  |                |
| Number of strata (countries)                                                                          |            |                  | 16              |                  |                |
| Number of primary sampling units (households)                                                         |            |                  | 32,616          |                  |                |

IRR = incidence rate ratio

95%-confidence interval

alpha = estimate of dispersion parameters

Age, social integration, contact frequency and closeness are centered at the mean

n = number of observations; N = population size based on survey design

Observations with missing values were dropped (listwise deletion).

Model 6 - Negative binomial regression models based on full sample - 2-way interaction

| <i>variable</i>                                                                           | <i>irr</i> | <i>std.error</i> | <i>conf.low</i> | <i>conf.high</i> | <i>p.value</i> |
|-------------------------------------------------------------------------------------------|------------|------------------|-----------------|------------------|----------------|
| <b>Gender: female (male = Ref.)</b>                                                       | 1.0444     | 0.0346           | 0.9761          | 1.1176           | 0.2083         |
| <b>Age</b>                                                                                | 1.0063     | 0.0028           | 1.0008          | 1.0119           | 0.0253         |
| <b>Education (ISCED-1997 Coding: 0=low – 6=high)</b>                                      | 0.944      | 0.0133           | 0.9198          | 0.9688           | 0.000          |
| <b>Income: make ends meet: fairly easy or easy (with great or some difficulty = Ref.)</b> | 0.8345     | 0.0332           | 0.782           | 0.8906           | 0.000          |
| <b>Employment status (employed = Ref.)</b>                                                |            |                  |                 |                  |                |
| <i>retired</i>                                                                            | 1.2499     | 0.0595           | 1.1123          | 1.4045           | 2e-04          |
| <i>unemployed</i>                                                                         | 1.0445     | 0.0642           | 0.9209          | 1.1847           | 0.4979         |
| <i>permanently sick or disabled</i>                                                       | 1.5056     | 0.0938           | 1.2528          | 1.8094           | 0.000          |
| <i>homemaker</i>                                                                          | 1.2846     | 0.0658           | 1.1291          | 1.4615           | 1e-04          |
| <b>Self-perceived health (0=poor – 4=excellent)</b>                                       | 0.7371     | 0.0279           | 0.6979          | 0.7785           | 0.000          |
| <b>Number of very to extremely close people in social network (0-7)</b>                   | 1.0486     | 0.0233           | 1.0017          | 1.0977           | 0.042          |
| <b>Self-perceived health * emotional closeness</b>                                        | 0.9804     | 0.0137           | 0.9544          | 1.0072           | 0.1506         |
| Intercept                                                                                 | 9.118      | 0.0624           | 8.0685          | 10.3041          | 0.000          |
| alpha                                                                                     | 0.6105     | 0.0265           | 0.5607          | 0.6648           |                |
| n – unweighted                                                                            |            |                  | 44,840          |                  |                |
| N – weighted                                                                              |            |                  | 112,626,161     |                  |                |
| Number of strata (countries)                                                              |            |                  | 16              |                  |                |
| Number of primary sampling units (households)                                             |            |                  | 33,160          |                  |                |

IRR = incidence rate ratio

95%-confidence interval

alpha = estimate of dispersion parameters

Age, social integration, contact frequency and closeness are centered at the mean

n = number of observations; N = population size based on survey design

Observations with missing values were dropped (listwise deletion).
