# Supplementary material
Source: HighWire-hosted journal article supplement (https://bmjopen.bmj.com/content/8/4/e018854)
Supplement: inline-supplementary-material-4 [file inline-supplementary-material-4.pdf]

## SUPPLEMENT Table 4

Model 7 - Negative binomial regression models based on full sample – 3-way interaction  
(social integration index)

| <i>Variable</i>                                                                           | <i>irr</i> | <i>std.error</i> | <i>conf.low</i> | <i>conf.high</i> | <i>p.value</i> |
|-------------------------------------------------------------------------------------------|------------|------------------|-----------------|------------------|----------------|
| <b>Gender: female (male = Ref.)</b>                                                       | 1.033      | 0.029            | 0.9759          | 1.0935           | 0.263          |
| <b>Age</b>                                                                                | 1.0061     | 0.0029           | 1.0003          | 1.0119           | 0.0377         |
| <b>Education (ISCED-1997 Coding: 0=low – 6=high)</b>                                      | 0.9441     | 0.0127           | 0.9209          | 0.9678           | 0.000          |
| <b>Income: make ends meet: fairly easy or easy (with great or some difficulty = Ref.)</b> | 0.851      | 0.0293           | 0.8035          | 0.9014           | 0.000          |
| <b>Employment status (employed = Ref.)</b>                                                |            |                  |                 |                  |                |
| <i>retired</i>                                                                            | 0.7027     | 0.0285           | 0.6645          | 0.7432           | 0.000          |
| <i>unemployed</i>                                                                         | 1.0258     | 0.0564           | 0.9185          | 1.1456           | 0.6519         |
| <i>permanently sick or disabled</i>                                                       | 1.0986     | 0.1099           | 0.8857          | 1.3625           | 0.3923         |
| <i>homemaker</i>                                                                          | 1.0305     | 0.1441           | 0.7769          | 1.3668           | 0.8349         |
| <b>Self-perceived health (0=poor – 4=excellent)</b>                                       | 1.2763     | 0.1287           | 0.9917          | 1.6426           | 0.058          |
| <b>Social integration index (0=low – 6=high)</b>                                          | 1.4546     | 0.1577           | 1.068           | 1.9813           | 0.0175         |
| <b>Self-perceived health * Social integration index</b>                                   | 1.0028     | 0.0229           | 0.9587          | 1.0489           | 0.9033         |
| <b>Self-perceived health * employment status</b>                                          |            |                  |                 |                  |                |
| <i>Self-perceived health * retired</i>                                                    | 1.0807     | 0.0447           | 0.9901          | 1.1797           | 0.0823         |
| <i>Self-perceived health * unemployed</i>                                                 | 1.0201     | 0.0683           | 0.8922          | 1.1663           | 0.7708         |
| <i>Self-perceived health * permanently sick or disabled</i>                               | 1.1167     | 0.0874           | 0.9408          | 1.3254           | 0.207          |
| <i>Self-perceived health * homemaker</i>                                                  | 0.9394     | 0.0692           | 0.8202          | 1.0758           | 0.366          |
| <b>Social integration index * employment status</b>                                       |            |                  |                 |                  |                |
| <i>Social integration index * retired</i>                                                 | 0.9694     | 0.061            | 0.8602          | 1.0925           | 0.6107         |
| <i>Social integration index * unemployed</i>                                              | 1.1323     | 0.0829           | 0.9626          | 1.3321           | 0.1337         |
| <i>Social integration index * permanently sick or disabled</i>                            | 0.908      | 0.1141           | 0.7261          | 1.1355           | 0.3977         |

|                                                                                        |        |        |             |         |        |
|----------------------------------------------------------------------------------------|--------|--------|-------------|---------|--------|
| <i>Social integration index * homemaker</i>                                            | 0.8828 | 0.1035 | 0.7206      | 1.0814  | 0.2284 |
| <b>Self-perceived health * social integration index * employment status</b>            |        |        |             |         |        |
| <i>Self-perceived health * social integration index * retired</i>                      | 0.9805 | 0.0251 | 0.9334      | 1.0299  | 0.4327 |
| <i>Self-perceived health * social integration index * unemployed</i>                   | 0.9504 | 0.041  | 0.877       | 1.0299  | 0.2147 |
| <i>Self-perceived health * social integration index * permanently sick or disabled</i> | 1.0483 | 0.0796 | 0.8969      | 1.2253  | 0.5532 |
| <i>Self-perceived health * social integration index * homemaker</i>                    | 1.0033 | 0.0466 | 0.9157      | 1.0993  | 0.9438 |
| Intercept                                                                              | 9.8174 | 0.0854 | 8.3046      | 11.6058 | 0.000  |
| alpha                                                                                  | 0.6045 | 0.0240 | 0.5596      | 0.6539  |        |
| n – unweighted                                                                         |        |        | 47,066      |         |        |
| N – weighted                                                                           |        |        | 119,390,189 |         |        |
| Number of strata (countries)                                                           |        |        | 16          |         |        |
| Number of primary sampling units (households)                                          |        |        | 34,623      |         |        |

IRR = incidence rate ratio

95%-confidence interval

alpha = estimate of dispersion parameters

Age, social integration, contact frequency and closeness are centered at the mean

n = number of observations; N = population size based on survey design

Observations with missing values were dropped (listwise deletion).

Model 8 - Negative binomial regression models based on full sample – 3-way interaction  
(social contact frequency)

| <i>Variable</i>                                                                                       | <i>irr</i> | <i>std.error</i> | <i>conf.low</i> | <i>conf.high</i> | <i>p.value</i> |
|-------------------------------------------------------------------------------------------------------|------------|------------------|-----------------|------------------|----------------|
| <b>Gender: female (male = Ref.)</b>                                                                   | 1.0574     | 0.0326           | 0.992           | 1.1271           | 0.0867         |
| <b>Age</b>                                                                                            | 1.0066     | 0.0028           | 1.0011          | 1.0121           | 0.018          |
| <b>Education (ISCED-1997 Coding: 0=low – 6=high)</b>                                                  | 0.9464     | 0.0117           | 0.9249          | 0.9684           | 0.000          |
| <b>Income: make ends meet: fairly easy or easy (with great or some difficulty = Ref.)</b>             | 0.8477     | 0.0317           | 0.7966          | 0.9021           | 0.000          |
| <b>Employment status (employed = Ref.)</b>                                                            |            |                  |                 |                  |                |
| <i>retired</i>                                                                                        | 0.7102     | 0.0284           | 0.6718          | 0.7509           | 0.000          |
| <i>unemployed</i>                                                                                     | 1.0848     | 0.0757           | 0.9352          | 1.2584           | 0.2823         |
| <i>permanently sick or disabled</i>                                                                   | 1.1295     | 0.1135           | 0.9042          | 1.4108           | 0.2834         |
| <i>homemaker</i>                                                                                      | 1.0391     | 0.1435           | 0.7845          | 1.3765           | 0.7889         |
| <b>Self-perceived health (0=poor – 4=excellent)</b>                                                   | 1.3951     | 0.1594           | 1.0207          | 1.9067           | 0.0367         |
| <b>Average of contact frequency in social network (0=less than once per month or never – 5=daily)</b> | 1.4007     | 0.191            | 0.9633          | 2.0367           | 0.0777         |
| <b>Self-perceived health * Contact frequency</b>                                                      | 0.9626     | 0.0284           | 0.9104          | 1.0177           | 0.1796         |
| <b>Self-perceived health * employment status</b>                                                      |            |                  |                 |                  |                |
| <i>Self-perceived health * retired</i>                                                                | 1.0681     | 0.0455           | 0.977           | 1.1676           | 0.1475         |
| <i>Self-perceived health * unemployed</i>                                                             | 0.9969     | 0.0685           | 0.8716          | 1.1402           | 0.9635         |
| <i>Self-perceived health * permanently sick or disabled</i>                                           | 1.0637     | 0.1135           | 0.8516          | 1.3287           | 0.586          |
| <i>Self-perceived health * homemaker</i>                                                              | 0.9208     | 0.0822           | 0.7838          | 1.0817           | 0.3153         |
| <b>Contact frequency * employment status</b>                                                          |            |                  |                 |                  |                |
| <i>Contact frequency * retired</i>                                                                    | 0.8891     | 0.0948           | 0.7384          | 1.0706           | 0.2149         |
| <i>Contact frequency * unemployed</i>                                                                 | 0.7879     | 0.1516           | 0.5853          | 1.0605           | 0.1158         |
| <i>Contact frequency * permanently sick or disabled</i>                                               | 0.9316     | 0.1271           | 0.7262          | 1.1952           | 0.5774         |
| <i>Contact frequency * homemaker</i>                                                                  | 1.0568     | 0.1504           | 0.787           | 1.419            | 0.7134         |

**Self-perceived health \* Contact frequency \*  
employment status**

|                                                                                     |        |        |             |         |        |
|-------------------------------------------------------------------------------------|--------|--------|-------------|---------|--------|
| <i>Self-perceived health * Contact frequency *<br/>retired</i>                      | 1.0949 | 0.0464 | 0.9998      | 1.1992  | 0.0506 |
| <i>Self-perceived health * Contact frequency *<br/>unemployed</i>                   | 1.1731 | 0.0742 | 1.0144      | 1.3567  | 0.0314 |
| <i>Self-perceived health * Contact frequency *<br/>permanently sick or disabled</i> | 1.0632 | 0.0622 | 0.9412      | 1.2011  | 0.3242 |
| <i>Self-perceived health * Contact frequency *<br/>homemaker</i>                    | 1.0475 | 0.0663 | 0.9199      | 1.1928  | 0.4838 |
| Intercept                                                                           | 9.4885 | 0.0848 | 8.0361      | 11.2034 | 0.000  |
| Alpha                                                                               | 0.6009 | 0.0245 | 0.5547      | 0.6509  |        |
| n – unweighted                                                                      |        |        | 43,962      |         |        |
| N – weighted                                                                        |        |        | 110,219,002 |         |        |
| Number of strata (countries)                                                        |        |        | 16          |         |        |
| Number of primary sampling units (households)                                       |        |        | 32,616      |         |        |

IRR = incidence rate ratio

95%-confidence interval

alpha = estimate of dispersion parameters

Age, social integration, contact frequency and closeness are centered at the mean

n = number of observations; N = population size based on survey design

Observations with missing values were dropped (listwise deletion).

Model 9 - Negative binomial regression models based on full sample – 3-way interaction  
(emotional closeness)

| <i>Variable</i>                                                                           | <i>irr</i> | <i>std.error</i> | <i>conf.low</i> | <i>conf.high</i> | <i>p.value</i> |
|-------------------------------------------------------------------------------------------|------------|------------------|-----------------|------------------|----------------|
| <b>Gender: female (male = Ref.)</b>                                                       | 1.0428     | 0.0338           | 0.9759          | 1.1143           | 0.2152         |
| <b>Age</b>                                                                                | 1.0066     | 0.0029           | 1.0008          | 1.0124           | 0.0258         |
| <b>Education (ISCED-1997 Coding: 0=low – 6=high)</b>                                      | 0.9437     | 0.0126           | 0.9206          | 0.9673           | 0.000          |
| <b>Income: make ends meet: fairly easy or easy (with great or some difficulty = Ref.)</b> | 0.834      | 0.032            | 0.7833          | 0.888            | 0.000          |
| <b>Employment status (employed = Ref.)</b>                                                |            |                  |                 |                  |                |
| <i>retired</i>                                                                            | 0.7057     | 0.0287           | 0.6671          | 0.7465           | 0.000          |
| <i>unemployed</i>                                                                         | 0.997      | 0.0447           | 0.9133          | 1.0884           | 0.9462         |
| <i>permanently sick or disabled</i>                                                       | 1.1027     | 0.1153           | 0.8797          | 1.3823           | 0.3964         |
| <i>homemaker</i>                                                                          | 0.9959     | 0.1493           | 0.7433          | 1.3345           | 0.9781         |
| <b>Self-perceived health (0=poor – 4=excellent)</b>                                       | 1.3689     | 0.1537           | 1.0128          | 1.8503           | 0.0411         |
| <b>Number of very to extremely close people in social network (0-7)</b>                   | 1.4595     | 0.1588           | 1.0691          | 1.9926           | 0.0173         |
| <b>Self-perceived health * Contact frequency</b>                                          | 1.0089     | 0.016            | 0.9778          | 1.041            | 0.5778         |
| <b>Self-perceived health * employment status</b>                                          |            |                  |                 |                  |                |
| <i>Self-perceived health * retired</i>                                                    | 1.0726     | 0.0458           | 0.9804          | 1.1734           | 0.1264         |
| <i>Self-perceived health * unemployed</i>                                                 | 1.0202     | 0.0701           | 0.8891          | 1.1705           | 0.7758         |
| <i>Self-perceived health * permanently sick or disabled</i>                               | 1.0548     | 0.1132           | 0.845           | 1.3167           | 0.6374         |
| <i>Self-perceived health * homemaker</i>                                                  | 0.9282     | 0.0666           | 0.8145          | 1.0576           | 0.2632         |
| <b>Emotional closeness * employment status</b>                                            |            |                  |                 |                  |                |
| <i>Emotional closeness * retired</i>                                                      | 1.0632     | 0.0543           | 0.9558          | 1.1827           | 0.2594         |
| <i>Emotional closeness * unemployed</i>                                                   | 1.0921     | 0.1072           | 0.8851          | 1.3476           | 0.4111         |
| <i>Emotional closeness * permanently sick or disabled</i>                                 | 1.1124     | 0.1122           | 0.8927          | 1.3861           | 0.3427         |
| <i>Emotional closeness * homemaker</i>                                                    | 0.931      | 0.0929           | 0.776           | 1.1168           | 0.4412         |
| <b>Self-perceived health * Emotional closeness *</b>                                      |            |                  |                 |                  |                |

**employment status**

|                                                                                       |        |        |             |         |        |
|---------------------------------------------------------------------------------------|--------|--------|-------------|---------|--------|
| <i>Self-perceived health * Emotional closeness *<br/>retired</i>                      | 0.963  | 0.0261 | 0.9151      | 1.0135  | 0.1483 |
| <i>Self-perceived health * Emotional closeness *<br/>unemployed</i>                   | 0.9513 | 0.05   | 0.8625      | 1.0493  | 0.3181 |
| <i>Self-perceived health * Emotional closeness *<br/>permanently sick or disabled</i> | 0.9751 | 0.0761 | 0.84        | 1.1318  | 0.7401 |
| <i>Self-perceived health * Emotional closeness *<br/>homemaker</i>                    | 1.0038 | 0.0401 | 0.9279      | 1.086   | 0.9247 |
| Intercept                                                                             | 9.9586 | 0.0854 | 8.4236      | 11.7733 | 0.000  |
| alpha                                                                                 | 0.6074 | 0.0255 | 0.5594      | 0.6595  |        |
| n – unweighted                                                                        |        |        | 44,840      |         |        |
| N – weighted                                                                          |        |        | 112,626,161 |         |        |
| Number of strata (countries)                                                          |        |        | 16          |         |        |
| Number of primary sampling units (households)                                         |        |        | 33,160      |         |        |

IRR = incidence rate ratio

95%-confidence interval

alpha = estimate of dispersion parameters

Age, social integration, contact frequency and closeness are centered at the mean

n = number of observations; N = population size based on survey design

Observations with missing values were dropped (listwise deletion).
